# Supplementary material for: Molecular evolution and phylogenetics of rodent malaria parasites
Source: PubMed Central journal article supplement (PMC3538709; doi:10.1186/1471-2148-12-219), 2012-11-14
Supplement: 1471-2148-12-219-S2.pdf [file 1471-2148-12-219-S2.pdf]

**Additional File 3. Posterior probabilities for the speciation models sampled by BPP, using the different algorithms and fine-tune parameters ( $\epsilon$ ,  $a$  and  $m$ ).** Priors were kept constant:  $\theta \sim G(1.5, 300)$  and  $\tau_0 \sim G(1.5, 30)$ . Each speciation model is represented using 0-1 flags for the interior nodes, with 0 indicating a collapsed node and 1 a resolved node. Nodes are ordered as in Figure 1, with the first flag corresponding to node  $a$ , the second to node  $b$ , and so on up to node  $l$ . Each cell has the posterior probability for two replicate runs of BPP, which started with different speciation models. NS: model not sampled.

| speciation<br>model | algorithm 0    |                 | algorithm 1      |                  |                |                |
|---------------------|----------------|-----------------|------------------|------------------|----------------|----------------|
|                     | $\epsilon = 5$ | $\epsilon = 20$ | $a = 0.5; m = 1$ | $a = 0.5; m = 2$ | $a = 2; m = 1$ | $a = 2; m = 2$ |
| 111111111111        | 0.997; 0.996   | 1; 1            | 0.996; 0.991     | 0.998; 1         | 0.995; 0.999   | 0.994; 0.986   |
| 111101111111        | 2.7E-3; 3.7E-3 | NS              | 4.1E-3; 8.7E-3   | 2.1E-3; NS       | 5.5E-3; 1.2E-3 | 6.2E-3; 0.014  |
