# Supplementary material for: Molecular evolution and phylogenetics of rodent malaria parasites
Source: PubMed Central journal article supplement (PMC3538709; doi:10.1186/1471-2148-12-219), 2012-11-14
Supplement: 1471-2148-12-219-S3.pdf [file 1471-2148-12-219-S3.pdf]

**Additional File 4. Posterior probabilities for the speciation models sampled by BPP, using different values for the  $\theta$  prior.** We varied only the  $\theta$  prior because, contrary to the  $\tau_0$  prior, this has been shown to have a strong impact upon the speciation probabilities (references 18 and 19 in main text). We used algorithm 0 with fine-tune  $\epsilon = 5$  for this analysis. Speciation model and cell content are as described for Table S3.

| <b>speciation model</b> | <b>G(1.5, 1500)</b> | <b>G(1.5, 150)</b> |
|-------------------------|---------------------|--------------------|
| 111111111111            | 0.939; 0.939        | 0.988; 0.975       |
| 111101111111            | 0.010; 0.005        | 0.012; 0.025       |
| 111111101111            | 0.050; 0.061        | NS                 |
