# Supplementary material for: Molecular evolution and phylogenetics of rodent malaria parasites
Source: PubMed Central journal article supplement (PMC3538709; doi:10.1186/1471-2148-12-219), 2012-11-14
Supplement: 1471-2148-12-219-S4.pdf [file 1471-2148-12-219-S4.pdf]

**Additional File 5. Ensemble genealogical sorting index (*gsiT*) for the independently evolving lineages identified by BPP.**

| <b>species</b>            | <b><i>gsiT</i><br/>(<i>p-values</i>)</b> |
|---------------------------|------------------------------------------|
| <i>P. berghei</i>         | 0.8333<br>(<0.001)                       |
| <i>P. c. adami</i>        | 0.4433<br>(<0.001)                       |
| <i>P. c. chabaudi</i>     | 0.8464<br>(<0.001)                       |
| <i>P. c. subsp.</i>       | 0.4163<br>(<0.001)                       |
| <i>P. v. brucechwatti</i> | 0.9167<br>(<0.001)                       |
| <i>P. v. lentum</i>       | 0.9167<br>(<0.001)                       |
| <i>P. v. petteri</i>      | 0.7407<br>(<0.001)                       |
| <i>P. v. subsp.</i>       | 0.7855<br>(<0.001)                       |
| <i>P. v. vinckei</i>      | 0.9167<br>(<0.001)                       |
| <i>P. y. killicki</i>     | 0.5986<br>(0.0954)                       |
| <i>P. y. nigeriensis</i>  | 0.6667<br>(<0.001)                       |
| <i>P. y. subsp.</i>       | 0.3308<br>(0.0854)                       |
| <i>P. y. yoelii</i>       | 0.7613<br>(<0.001)                       |
