# Supplementary material for: Molecular evolution and phylogenetics of rodent malaria parasites
Source: PubMed Central journal article supplement (PMC3538709; doi:10.1186/1471-2148-12-219), 2012-11-14
Supplement: 1471-2148-12-219-S8.pdf [file 1471-2148-12-219-S8.pdf]

**Additional File 10. Best likelihood models and estimates of the proportion of adaptive substitutions across loci ( $\bar{\alpha}$ ).** Divergence was measured to the inferred ancestral sequence of the *P. chabaudi*-*P. vinckei* clade (*P. c. chabaudi* and *P. v.* subsp.) or the *P. berghei*-*P. yoelii* clade (*P. y. yoelii*). The best (highest Akaike weight) and secondary models are shown, with Akaike weights in brackets. Estimates of  $\bar{\alpha}$  (and 95% CI) across loci were obtained from 1000 bootstraps on the results of model ii. Likelihood models: i)  $\alpha$  is constrained to zero at all loci, i.e. no adaptive evolution; ii)  $\alpha$  is a free-parameter common to all loci; and iii)  $\alpha$  can take a different value at each locus.

| <b>taxa</b>              | <b>dataset</b>      | <b>best<br/>model</b> | <b>secondary<br/>model</b> | $\bar{\alpha}$         |
|--------------------------|---------------------|-----------------------|----------------------------|------------------------|
| <i>P. c. chabaudi</i>    | all loci            | iii (1.00)            | -                          | 0.640 (0.212; 0.874)   |
|                          | w/out <i>cyspro</i> | ii (0.65)             | i (0.33)                   | 0.456 (0.061; 0.769)   |
| <i>P. vinckei</i> subsp. | all loci            | iii (0.97)            | i (0.03)                   | 0.165 (-0.120; 0.516)  |
|                          | w/out <i>cyspro</i> | i (0.73)              | ii (0.27)                  | 0.279 (-0.067; 0.698)  |
| <i>P. y. yoelii</i>      | all loci            | i (0.74)              | ii (0.26)                  | -0.261 (-1.189; 0.516) |
|                          | w/out <i>cyspro</i> | i (0.70)              | ii (0.30)                  | -0.524 (-1.939; 0.470) |
