# Supplementary material for: Molecular evolution and phylogenetics of rodent malaria parasites
Source: PubMed Central journal article supplement (PMC3538709; doi:10.1186/1471-2148-12-219), 2012-11-14
Supplement: 1471-2148-12-219-S9.pdf [file 1471-2148-12-219-S9.pdf]

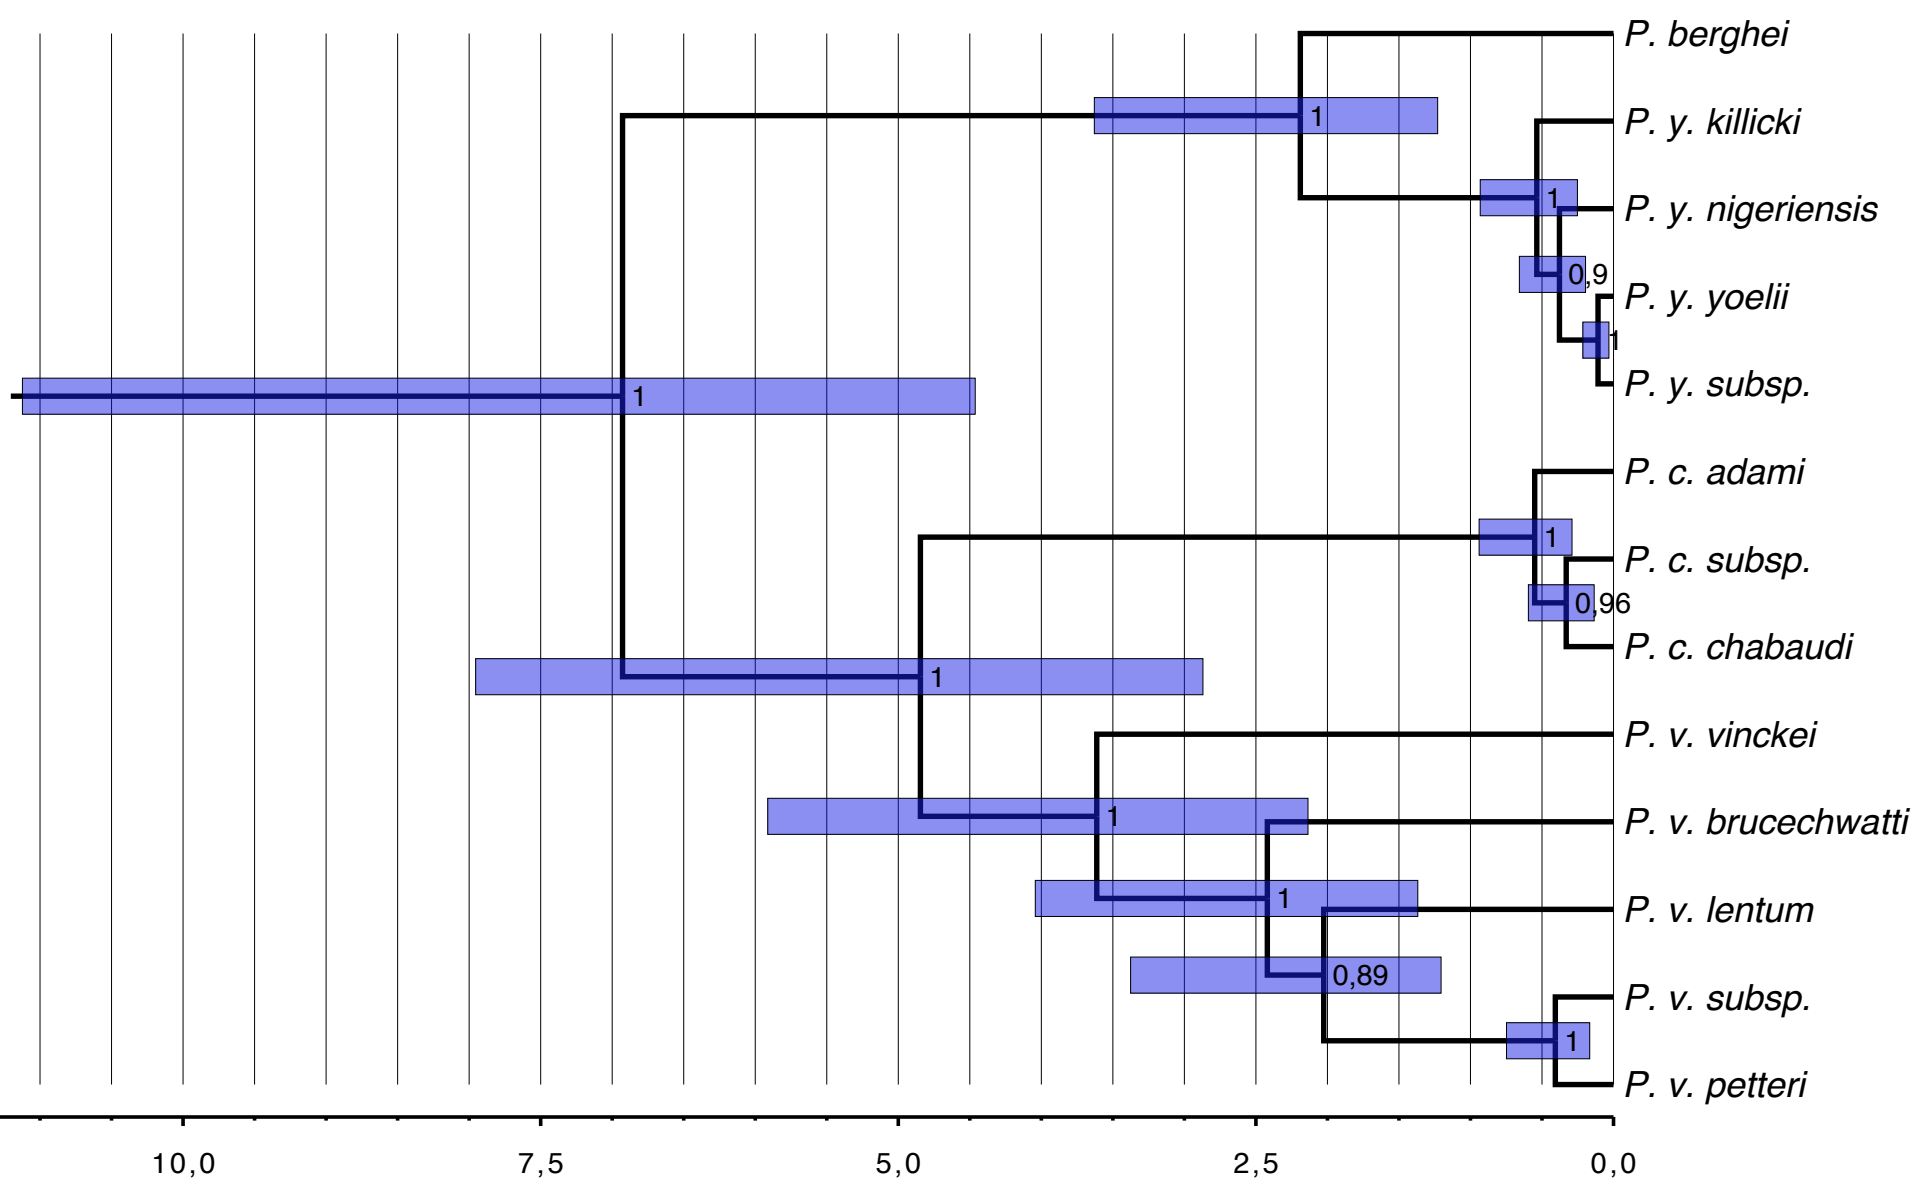

**Additional File 11. Species tree inferred by \*BEAST under the Pacheco2011-A calibration.** Node labels are posterior probabilities and node bars represent 95% Highest Posterior Densities on the height of each node. Axis is in million years ago (Mya).
