# Supplementary material for: Molecular evolution and phylogenetics of rodent malaria parasites
Source: PubMed Central journal article supplement (PMC3538709; doi:10.1186/1471-2148-12-219), 2012-11-14
Supplement: 1471-2148-12-219-S11.pdf [file 1471-2148-12-219-S11.pdf]

**Additional File 2. Primer sequences (5'-3') used in PCR for the selected loci.** PCR cycling conditions: 95°C for 3 min.; 10 cycles of: 94°C for 30s, 57°C for 30s (-1°C per cycle), 72°C for 1.5 min.; 35 cycles of: 94°C for 30s, 47°C for 30s, 72°C for 1.5 min.; 72°C for 3 min.

| <b>gene</b>    | <b>forward primer</b>       | <b>reverse primer</b>      |
|----------------|-----------------------------|----------------------------|
| <i>26s</i>     | ATCATCAGGGGAACATTTACCATCGA  | ATGCCATTCCTTCAACTGTGGCAAT  |
| <i>atpase</i>  | ATTGATACTCCTGGACAAATAGAA    | TGACATCTTTGTCTTCTCCATATTG  |
| <i>cons</i>    | TGATCACAGTTTAAGTGTATATGACAG | TTTCTCTGCCTTTATCATGGTAC    |
| <i>cyspro</i>  | CAATGAAATGGTAGGTAAAAATGGT   | CCATGAATTTCTAATGATCCAGTAAT |
| <i>dhfr</i>    | CAAGATGATAGAACAGGTGTTGGTG   | CCCAATACATGTATAAATTCAGCTG  |
| <i>exonuc</i>  | GTAGTGCGTCCTATGGATATTTA     | GAATTAGCTCTTTTGATATCGGTCT  |
| <i>gdpmp</i>   | TGAAGGGATAAAACATTTATGGCCT   | GTGTATTGCTTGTCTATGGAAACG   |
| <i>glurna</i>  | AAGTTGTTACTCGATTTCCACC      | GGCATGCAAATCATAAGTTGGAT    |
| <i>hsp70</i>   | TTCCTATGATTATGTTGTGGATCA    | CGTGTAAGTGTCTTCTGTAAGC     |
| <i>metrans</i> | TATTACCAGCAAGTTTTAGAGC      | GGAATTGTACCAGTAAATCCTT     |
| <i>rnabind</i> | GGAAAGTATGTCTAGGTATTCCAAC   | GGTCTGCTATCTCCTAATTGTGA    |
